# Supplementary material for: Green Hydrogels Composed of Sodium Mannuronate/Guluronate, Gelatin and Biointeractive Calcium Silicates/Dicalcium Phosphate Dihydrate Designed for Oral Bone Defects Regeneration
Source: MDPI journal article supplement (doi:10.3390/nano11123439), 2021-12-18
Supplement: s1 [file s1]

## Supplementary Material

# Green Hydrogels Composed of Sodium Mannuronate/Guluronate, Gelatin and Biointeractive Calcium Silicates/Dicalcium Phosphate Dihydrate Designed for Oral Bone Defects Regeneration

Maria Giovanna Gandolfi <sup>1,\*</sup>, Fausto Zamparini <sup>1,2</sup>, Sabrina Valente <sup>3</sup>, Greta Parchi <sup>1</sup>, Gianandrea Pasquinelli <sup>3,4</sup>, Paola Taddei <sup>5</sup> and Carlo Prati <sup>2</sup>

<sup>1</sup> Laboratory of Green Biomaterials and Oral Pathology, School of Dentistry, DIBINEM, University of Bologna, Bologna, 40125, Italy; fausto.zamparini2@unibo.it (F.Z.); greta.parchi@studio.unibo.it (G.P.)

<sup>2</sup> Endodontic Clinical Section, School of Dentistry, DIBINEM, University of Bologna, Bologna, 40125, Italy; carlo.prati@unibo.it

<sup>3</sup> Department of Experimental, Diagnostic and Specialty Medicine, DIMES, University of Bologna, Bologna, 40138, Italy; sabrina.valente2@unibo.it (S.V.); gianandr.pasquinelli@unibo.it (G.P.)

<sup>4</sup> Subcellular Nephro-Vascular Diagnostic Program, Pathology Unit, IRCCS Azienda Ospedaliero-Universitaria di Bologna, Bologna, 40138, Italy

<sup>5</sup> Biochemistry Unit, DIBINEM, University of Bologna, Bologna, 40126, Italy; paola.taddei@unibo.it

\* Correspondence: mgiovanna.gandolfi@unibo.it

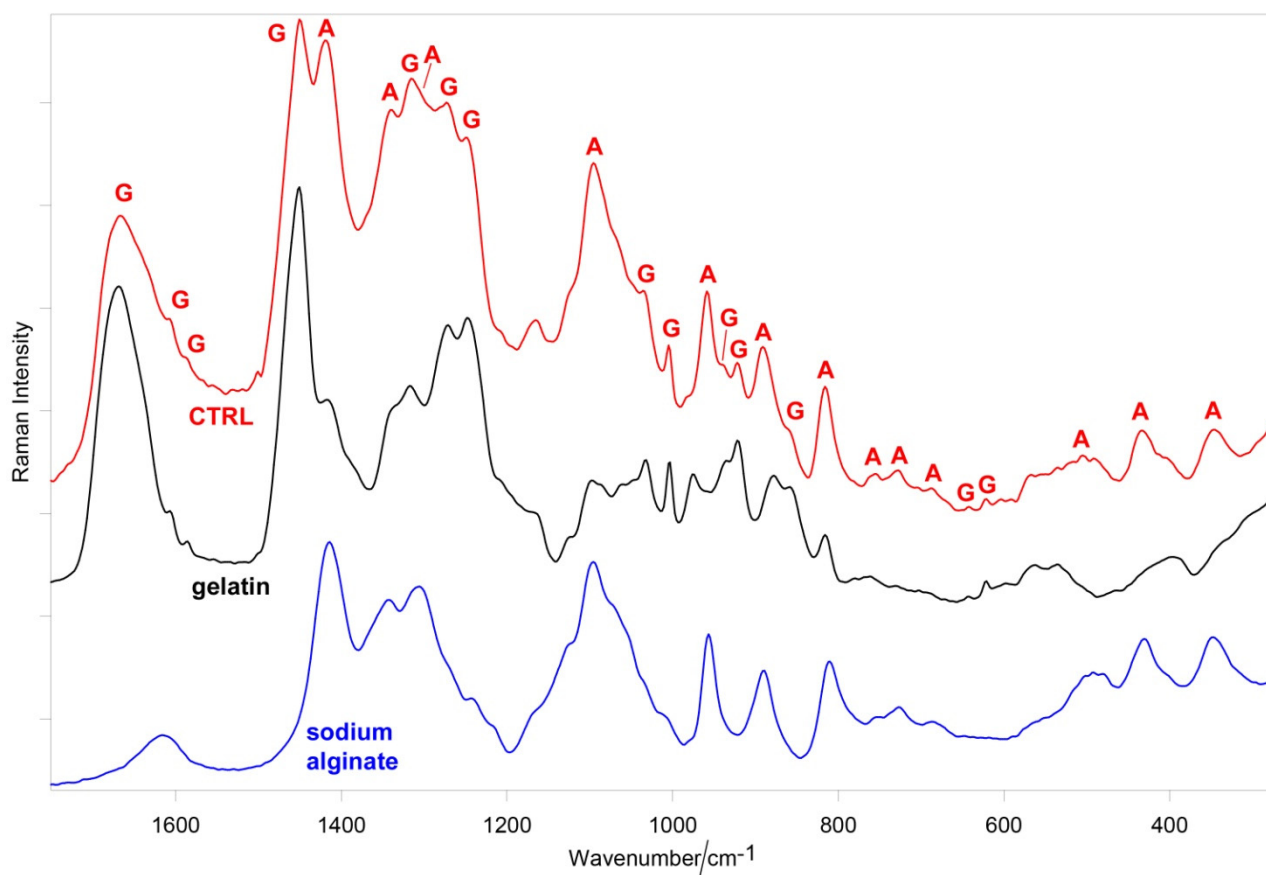

**Figure S1.** Average FT-Raman spectra of fresh CTRL hydrogel, gelatin and sodium alginate powders. Band wavenumbers are reported in Table S1, Supplementary Material. The main bands prevalently assignable to gelatin (G) and poly(sodium D-mannuronate-co-L-guluronate) (A) are indicated. When both components contribute to a band, the main contribution is indicated.

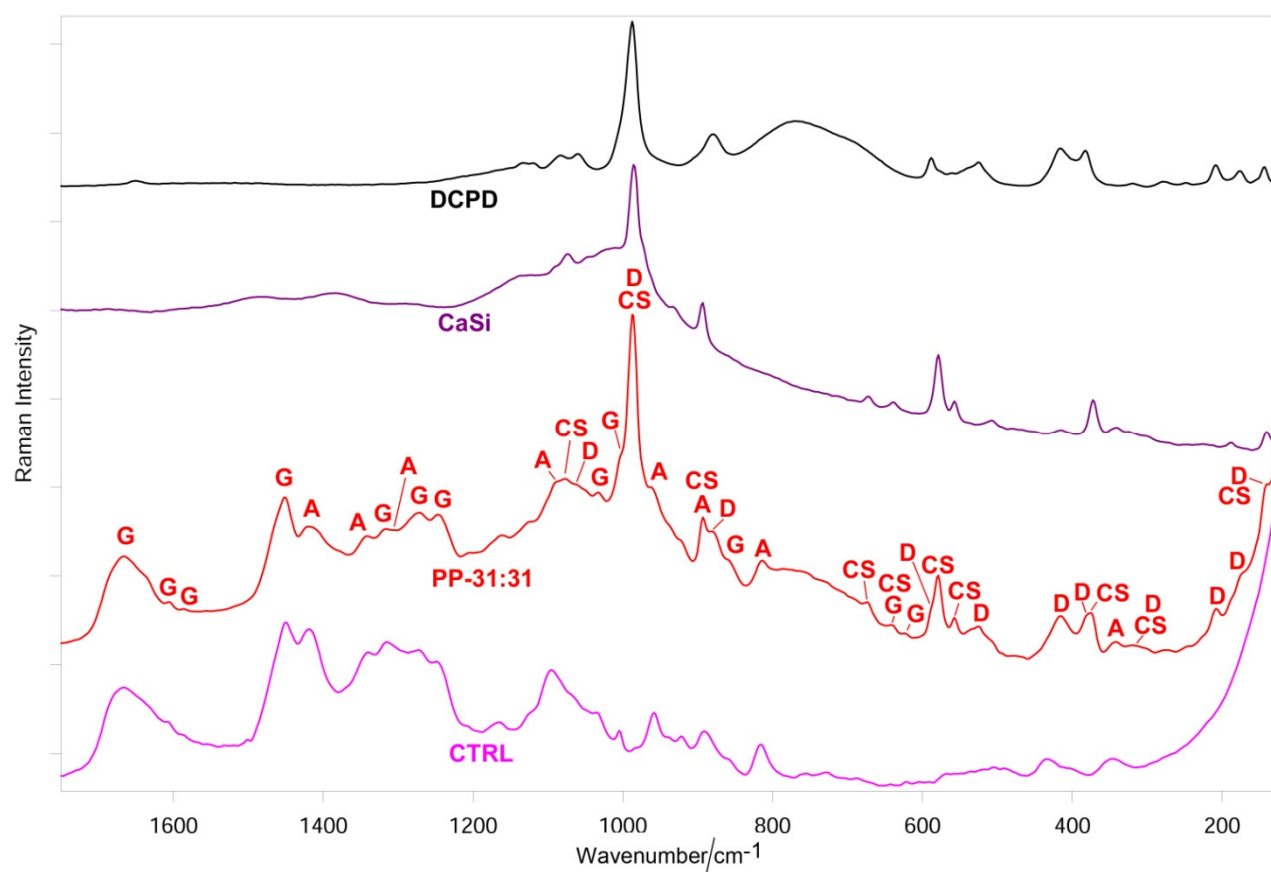

**Figure S2.** Average FT-Raman spectra of fresh PP-31:31, fresh CTRL hydrogel, DCDP and CaSi powders. Band wavenumbers are reported in Table S2, Supplementary Material. The bands prevalently assignable to gelatin (G), poly(sodium D-mannuronate-co-L-gulonate) (A), DCPD (D) and CaSi hydraulic cement (CS) are indicated.

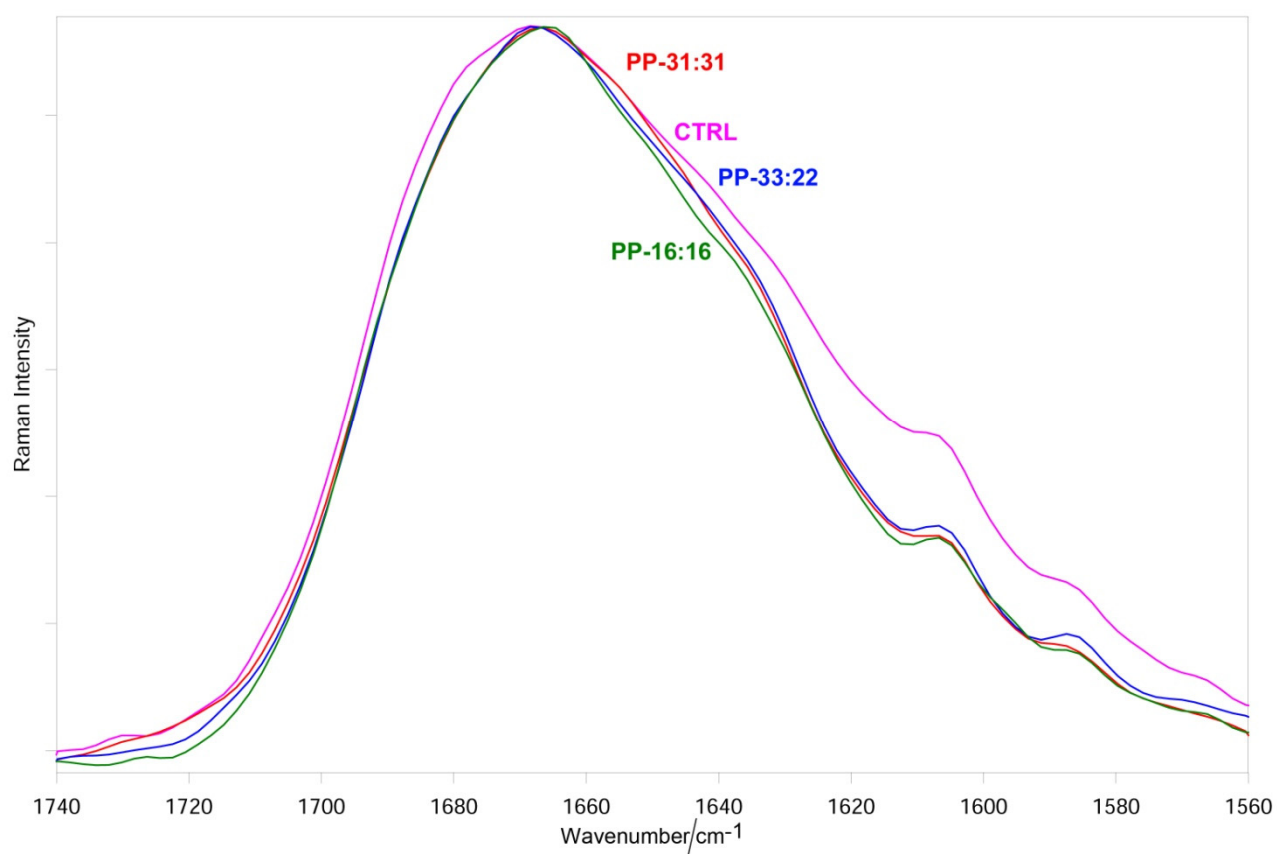

**Figure S3.** Average FT-Raman spectra of fresh PP-16:16, PP-33:22 and PP-31:31 in the Amide I range.

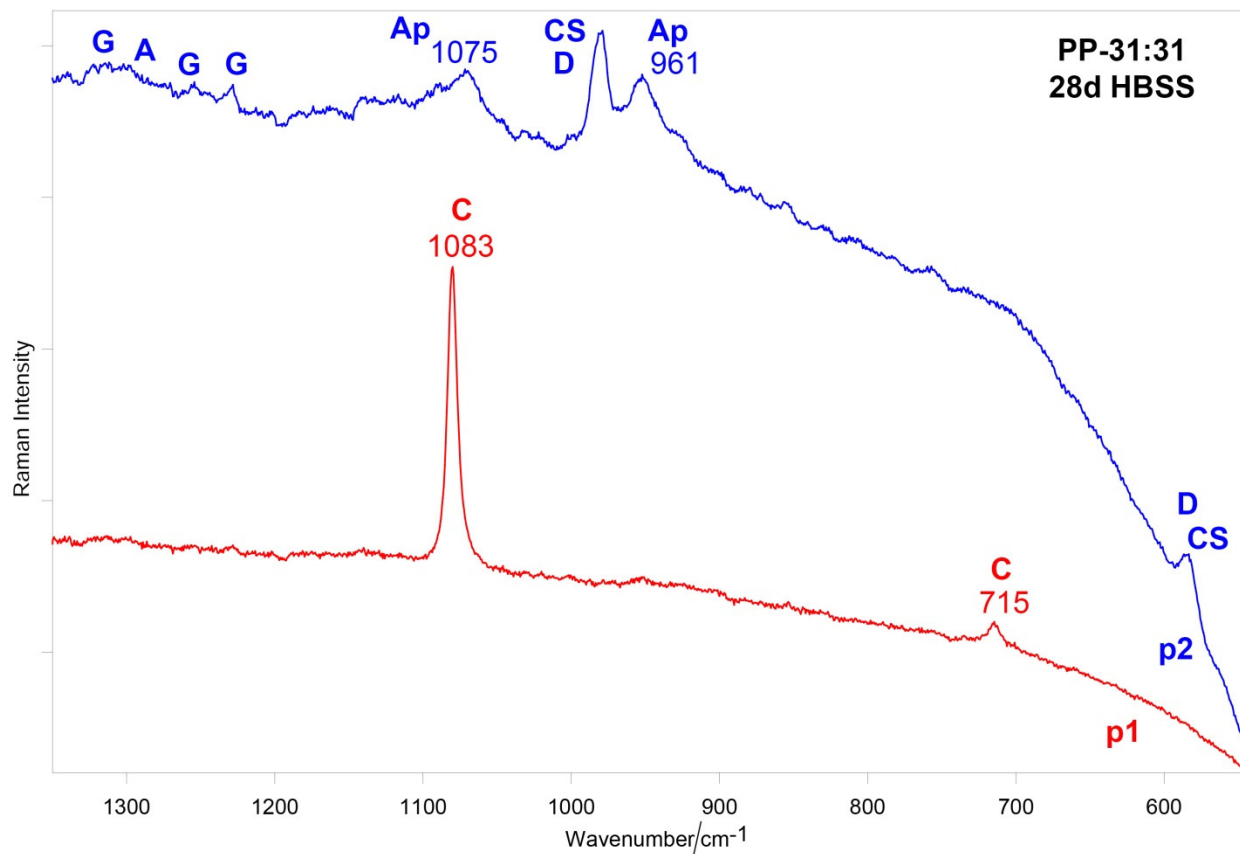

**Figure S4.** Micro-Raman spectra recorded on two different points (p1 and p2) of the PP-31:31 scaffold aged in HBSS for 28 days. The bands prevalently assignable to gelatin (G), poly(sodium D-mannuronate-co-L-guluronate) (A), DCPD (D), CaSi hydraulic cement (CS), calcite (C) and B-type carbonated apatite (Ap) are indicated.

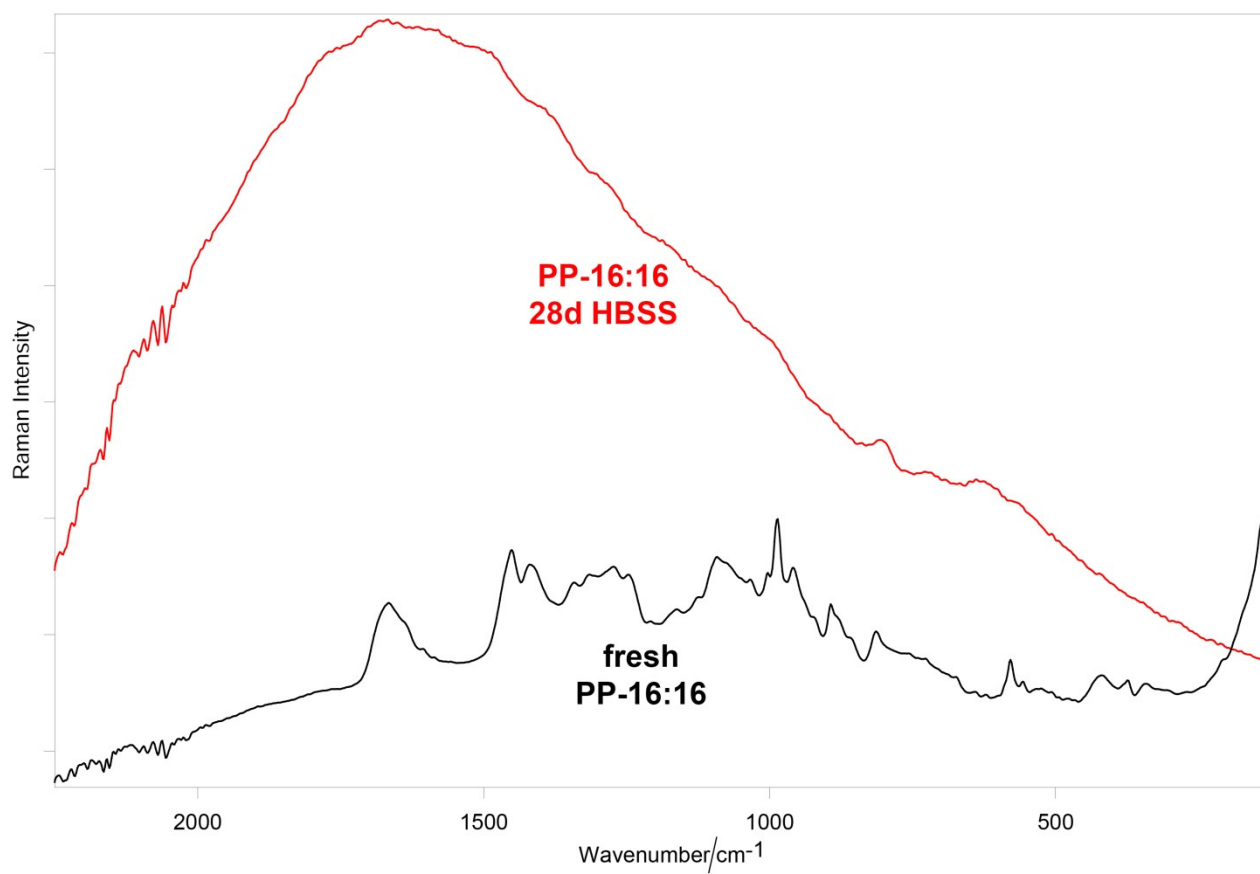

**Figure S5.** Average FT-Raman spectra of fresh PP-16:16 and after ageing for 28 days in HBSS.

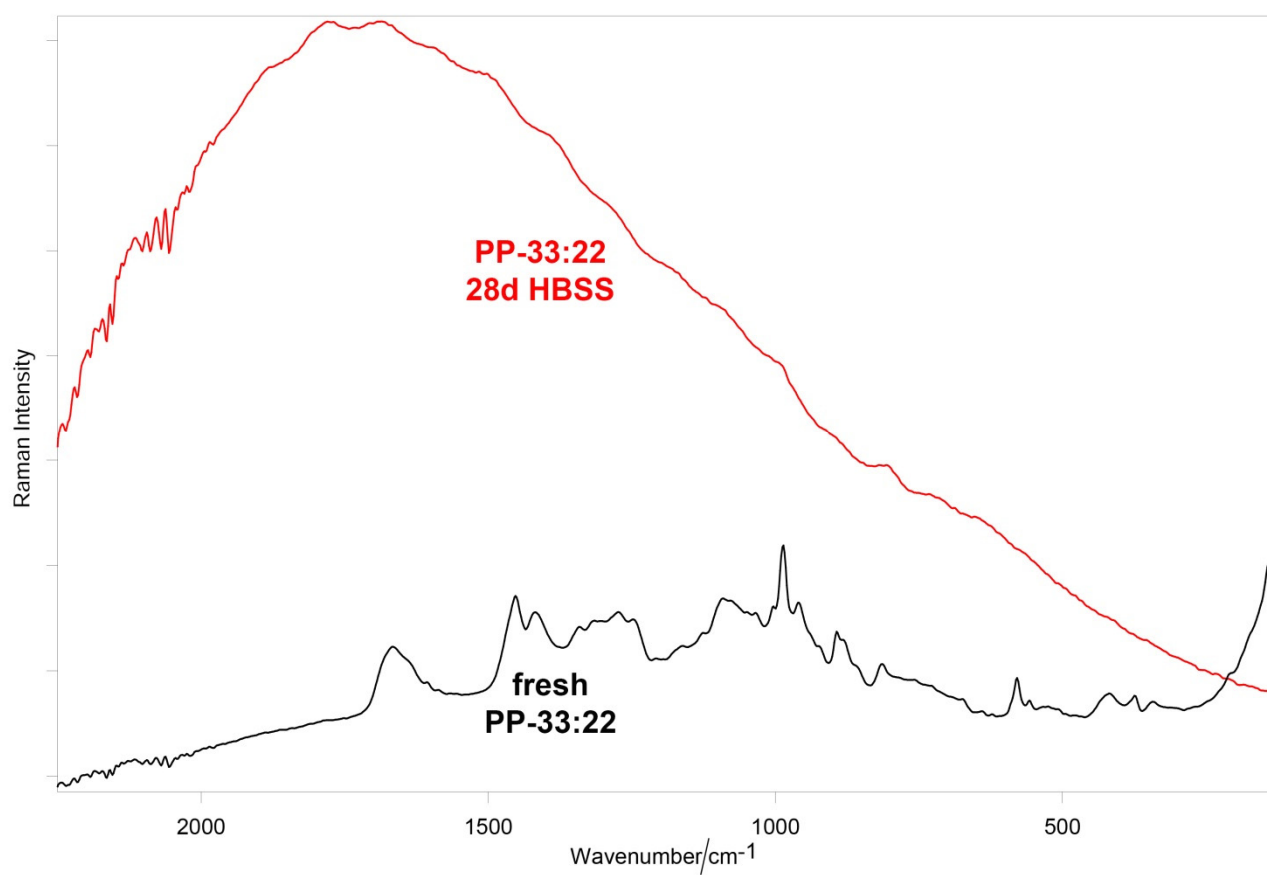

**Figure S6.** Average FT-Raman spectra of fresh PP-33:22 and after ageing for 28 days in HBSS.

**Table S1.** 1800–300 cm<sup>-1</sup> wavenumbers (cm<sup>-1</sup>) of the main Raman bands of fresh CTRL hydrogel, gelatin and poly(sodium D-mannuronate-co-L-guluronate) powders.

| CTRL hydrogel   | Gelatin powder  | Poly(sodium D-mannuronate-co-L-guluronate) powder |
|-----------------|-----------------|---------------------------------------------------|
| 1667            | 1669            |                                                   |
|                 |                 | 1616                                              |
| 1608            | 1607            |                                                   |
| 1588            | 1586            |                                                   |
| 1450            | 1451            |                                                   |
| 1419            | 1417            | 1414                                              |
| 1340            | 1337 (shoulder) | 1343                                              |
| 1315            | 1317            |                                                   |
| 1308 (shoulder) |                 | 1306                                              |
| 1273            | 1272            |                                                   |
| 1249            | 1248            | 1243                                              |
| 1095            | 1098            | 1096                                              |
| 1035            | 1033            |                                                   |
| 1005            | 1004            |                                                   |
| 958             |                 | 957                                               |
| 942             | 937             |                                                   |
| 922             | 922             |                                                   |
| 891             |                 | 890                                               |
| 862             | 878-858         |                                                   |
| 816             | 816             | 811                                               |
| 755             | 762             |                                                   |
| 728             |                 | 727                                               |
| 688             |                 | 687                                               |
| 643             | 643             |                                                   |
| 622             | 622             |                                                   |
| 505             |                 | 492                                               |
| 434             |                 | 431                                               |
| 347             |                 | 348                                               |



**Table S2.** 1800–100 cm<sup>-1</sup> wavenumbers (cm<sup>-1</sup>) of the main Raman bands of fresh PP-31:31, fresh CTRL hydrogel, DCDP and CaSi powders.

| PP-31:31       | CTRL hydrogel | DCPD | CaSi |
|----------------|---------------|------|------|
| 1666           | 1667          |      |      |
| 1606           | 1608          |      |      |
| 1587           | 1588          |      |      |
| 1451           | 1450          |      |      |
| 1421           | 1419          |      |      |
| 1341           | 1340          |      |      |
| 1316           | 1315          |      |      |
| 1272           | 1273          |      |      |
| 1247           | 1249          |      |      |
| 1090           | 1095          |      |      |
| 1077           |               |      | 1074 |
| 1061           |               | 1060 |      |
| 1033           | 1035          |      |      |
|                | 1005          |      |      |
| 987            |               | 987  | 985  |
| 962            | 958           |      |      |
| 923            | 922           |      |      |
| 893            | 891           |      | 894  |
| 880            |               | 879  |      |
| 861            | 862           |      |      |
| 814            | 816           |      |      |
| 674            |               |      | 672  |
| 641            | 643           |      | 639  |
| 624            | 622           |      |      |
| 588 (shoulder) |               | 588  |      |
| 579            |               |      | 579  |
| 557            |               |      | 557  |
| 525            |               | 525  |      |
| 416            |               | 416  | 415  |
| 380 (shoulder) |               | 382  |      |
| 375            |               |      | 372  |

|     |     |     |     |
|-----|-----|-----|-----|
| 342 | 347 |     | 341 |
| 320 |     | 319 | 323 |
| 275 |     | 276 |     |
| 245 |     | 248 |     |
| 208 |     | 208 |     |
| 188 |     | 176 |     |
| 140 |     | 143 | 140 |

**Table S3.** 1800–250 cm<sup>-1</sup> wavenumbers (cm<sup>-1</sup>) of the main Raman bands of fresh PP-31:31 and after ageing in HBSS for 28 days.

| Fresh PP-31:31 | PP-31:31 in HBSS | Assignments               |
|----------------|------------------|---------------------------|
| 1666           | 1658             |                           |
| 1606           | 1606             |                           |
| 1587           | 1587             |                           |
| 1451           | 1450 (shoulder)  |                           |
|                | 1436 (shoulder)  |                           |
| 1421           | 1421             |                           |
| 1341           | 1339             |                           |
| 1316           | 1315             |                           |
| 1272           | 1272             |                           |
| 1247           | 1247             |                           |
| 1090           |                  |                           |
|                | 1087             | calcite                   |
| 1077           |                  |                           |
|                | 1076             | B-type carbonated apatite |
| 1061           |                  |                           |
| 1033           |                  |                           |
|                |                  |                           |
| 987            | 985              |                           |
| 962 shoulder   |                  |                           |
|                | 959 strong       | B-type carbonated apatite |
| 923            |                  |                           |
| 893            | 890              |                           |
| 880            |                  |                           |

|                |                |         |
|----------------|----------------|---------|
| 861            | 860            |         |
| 814            | 810            |         |
|                | 714            | calcite |
| 674            |                |         |
| 641            | 639            |         |
| 624            |                |         |
| 588 (shoulder) | 585 (shoulder) |         |
| 579            | 579            |         |
| 557            | 558            |         |
| 525            | 508            |         |
| 416            | 418            |         |
| 380 (shoulder) | 380 (shoulder) |         |
| 375            | 373            |         |
| 342            | 339            |         |
| 320            |                |         |
|                | 281            | calcite |
